# Supplementary material for: Cost Analysis of Aprotinin Reintroduction in French Cardiac Surgery Centres: A Real-World Data-Based Analysis
Source: Springer Nature journal article supplement (doi:10.1007/s12325-023-02464-7), 2023-03-03
Supplement: MOESM1 [file 24092068]

## **Title**

Budget impact model of aprotinin reintroduction in French cardiac surgery centres: a real-world data-based analysis

## **Authors**

Pascal Colson<sup>1,2</sup>, Jean-Luc Fellahi<sup>3,4</sup>, Philippe Gaudard<sup>1,5</sup>, Sophie Provenchère<sup>6,7</sup>, Bertrand Rozec<sup>8,9</sup> from the ARCOTHOVA Group

1. Department of Anesthesiology and Critical Care Medicine, Arnaud de Villeneuve Hospital, CHU Montpellier, Montpellier, France.
2. Montpellier University, INSERM, CNRS, Institut de Génomique Fonctionnelle, Montpellier, France
3. Department of Anesthesiology and Critical Care Medicine, Louis Pradel Hospital, Hospices Civils de Lyon, 59 boulevard Pinel, 69500 Lyon, France.
4. Laboratoire CarMeN, Inserm U1060, Université Claude Bernard Lyon 1, Lyon, France
5. University of Montpellier, PhyMedExp, INSERM, CNRS, Montpellier, France.
6. Department of Anesthesiology and Critical Care Medecine, AP-HP, Bichat-Claude-Bernard Hospital, Paris, France.
7. INSERM Clinical Investigation Center 007, Paris, France
8. Service d'Anesthésie-Réanimation, hôpital Laënnec, Centre Hospitalier Universitaire, Nantes, F-44093, France.
9. Institut du Thorax, Institut National de la Santé et de la Recherche Médicale (INSERM), Centre National de la Recherche Scientifique (CNRS), Université de Nantes, Nantes, F-44093, France.

**Corresponding author:**

Pr [Pascal Colson](#)

Department of Anesthesiology and Critical Care Medicine, Arnaud de Villeneuve Hospital,

CHU Montpellier. 371 avenue du doyen Gaston Giraud. 34295 Montpellier, France

Email: [p-colson@chu-montpellier.fr](mailto:p-colson@chu-montpellier.fr)

Table S1: Unit costs of the resources consumed

| Resources consumed                   | Unit              | Value (€ 2021) | Source                                                                                                     |
|--------------------------------------|-------------------|----------------|------------------------------------------------------------------------------------------------------------|
| <b>Antifibrinolytics</b>             |                   |                |                                                                                                            |
| Aprotinin                            | 50mL vial         | 71.5           | Base de données publique des médicaments <sup>1</sup>                                                      |
| Tranexamic acid                      | 5mL vial          | 0.7            |                                                                                                            |
| <b>Surgical procedure</b>            |                   |                |                                                                                                            |
| Operating room use                   | Cost/min          | 12.1           | ATIH - ENC 2018 : Décomposition des coûts GHM d'intérêt par postes de dépense <sup>2</sup>                 |
| <b>Transfusions</b>                  |                   |                |                                                                                                            |
| Red blood cell concentrate           | One bag           | 205.5          | JORF n°0300 du 28 décembre 2018; Texte n° 55 <sup>3</sup>                                                  |
| Frozen fresh plasma                  | One bag           | 36.4           | JORF n°0298 du 24 décembre 2015 ; Texte n° 54 <sup>4</sup>                                                 |
| Platelets                            | One bag           | 83.8           | JORF n°0300 du 28 décembre 2018; Texte n° 55 <sup>3</sup>                                                  |
| Fibrinogen                           | vial of 1 to 1,5g | 1 4028.2       | ATIH : Synthèse nationales annuelles des molécules onéreuses facturées en sus des GHS en 2019 <sup>5</sup> |
| <b>ICU stay</b>                      |                   |                |                                                                                                            |
| Stay in an intensive care unit (ICU) | Cost/day          | 1 962.5        | ATIH - Référentiel de coût des unités d'œuvres (RTC) 2019 <sup>6</sup>                                     |

<sup>1</sup> Base de données publique des médicaments [cited 2021 May 25]. Available from: <https://base-donnees-publique.medicaments.gouv.fr>

<sup>2</sup> ATIH ENC 2018 Diagnosis Related Groups (DRG) costs [cited 2021 May 25]. Available from: <https://www.atih.sante.fr/enc-mco-donnees-2018>

<sup>3</sup> Arrêté du 26 décembre 2018 modifiant l'arrêté du 9 mars 2010 relatif au tarif de cession des produits sanguins labiles - Légifrance [Internet]. [cited 2022 Jun 16]. Available from: <https://www.legifrance.gouv.fr/jorf/id/JORFTEXT000037865128>

<sup>4</sup> Arrêté du 22 décembre 2015 modifiant l'arrêté du 9 mars 2010 relatif au tarif de cession des produits sanguins labiles - Légifrance [Internet]. [cited 2022 Jun 16]. Available from: <https://www.legifrance.gouv.fr/jorf/id/JORFTEXT000031680338>

<sup>5</sup> Synthèse nationales annuelles des molécules onéreuses facturées en sus des GHS en 2019. [cited 2022 Jun 16]. Available from: <https://www.scansante.fr/applications/synthese-dmi-mo-sus>

<sup>6</sup> Référentiel de coût des unités d'œuvres (RTC) | Stats ATIH [Internet]. 2019 [cited 2021 May 25]. Available from: <https://www.scansante.fr/applications/cout-dunites-doeuvre>

Table S2: Average costs per patient by treatment group

|                    | Aprotinin      |             | Tranexamic acid |             |
|--------------------|----------------|-------------|-----------------|-------------|
|                    | €              | %           | €               | %           |
| Antifibrinolytics  | €500           | 2.4%        | €4              | 0%          |
| Surgical procedure | €3 634         | 17.3%       | €3 696          | 15.3%       |
| Transfusions       | €2 958         | 14.1%       | €3 113          | 12.9%       |
| ICU stay           | €13 905        | 66.2%       | €17 320         | 71.8%       |
| <b>Total</b>       | <b>€20 997</b> | <b>100%</b> | <b>€24 133</b>  | <b>100%</b> |

ICU: Intensive care unit

Table S3: Representativeness of aprotinin-treated patients analysed compared to the whole NAPaR registry

| Patients treated with aprotinin | Hospital database | NAPaR Registry |
|---------------------------------|-------------------|----------------|
| <b>N</b>                        | <b>236</b>        | <b>827*</b>    |
| Age                             |                   |                |
| Missing data                    | 50                | 0              |
| Mean (SD)                       | 59.46 (14.96)     | 62 (13.7)      |
| Over 75 yo                      |                   |                |
| Missing data                    | 0                 | 0              |
| Yes                             | 30 (12.71%)       | 126 (15.24%)   |
| BMI                             |                   |                |
| Missing data                    | 53                | 0              |
| Mean (SD)                       | 25.76 (5.1)       | 26.4 (5.4)     |
| BMI < 25                        |                   |                |
| Missing data                    | 3                 | 0              |
| Yes                             | 106 (44.91%)      | 364 (44.01%)   |
| Redo surgery                    |                   |                |
| Missing data                    | 0                 | 0              |
| Yes                             | 91 (38.56%)       | 405 (49%)      |
| DAPT                            |                   |                |
| Missing data                    | 0                 | 0              |
| Yes                             | 41 (17.37%)       | 113 (13.73%)   |
| Indication                      |                   |                |
| Missing data                    | 0                 | 0              |
| Indication 1 (iCABG)            | 37 (17%)          | 141 (17%)      |
| Indications 2 et 3              | 199 (83 %)        | 686 (83%)      |

NP: Not specified; DAAP: patient taking at least 2 anti-platelet drugs when undergoing cardiac surgery.

\*Of the 874 NAPAR patients registered during the analysis period, only 827 patients who had actually been exposed to aprotinin had given their consent for their data to be used
